# Supplementary material
Source: PubMed Central journal article supplement (PMC544061)
Supplement: pnas_102_1_15__3.pdf [file pnas_102_1_15__3.pdf]

[illegible]
