# Supplementary material
Source: PubMed Central journal article supplement (PMC544061)

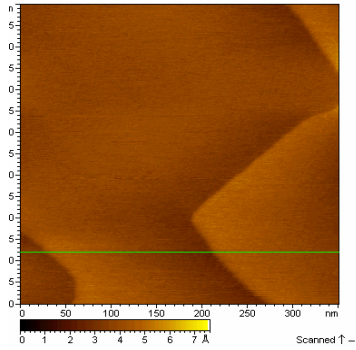

**Au**

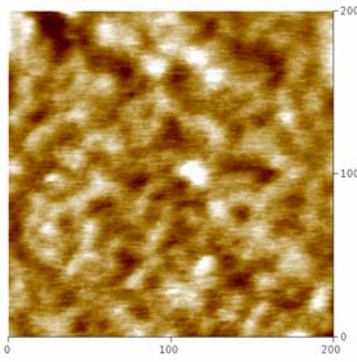

**1G**

Digital Instruments NanoScope  
 Scan size 200.0 nm  
 Scan rate 1.001 Hz  
 Number of samples 256  
 Image Data Height  
 Data scale 1.0000 nm

**1G**

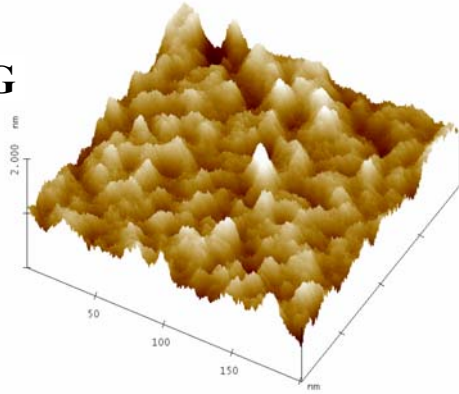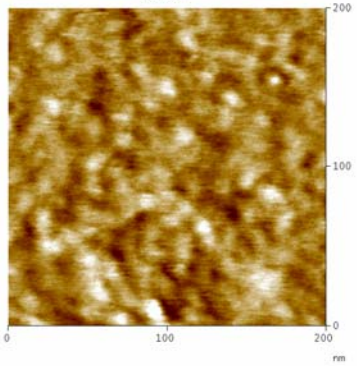

**8G**

Digital Instruments NanoScope  
 Scan size 200.0 nm  
 Scan rate 0.7978 Hz  
 Number of samples 256  
 Image Data Height  
 Data scale 1.000 nm

**8G**

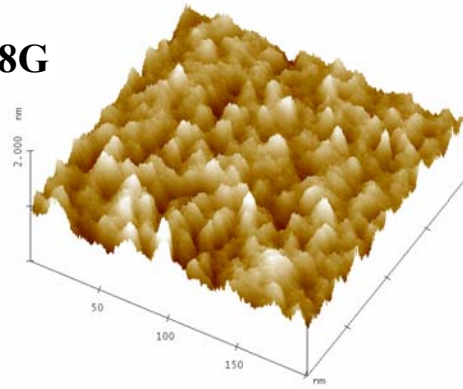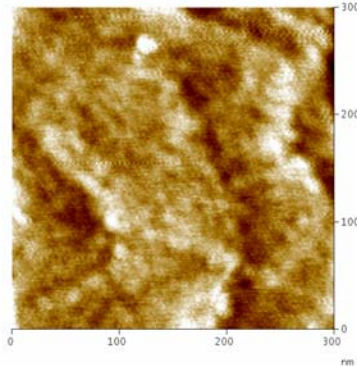

**G<sub>3</sub>C-ds**

Digital Instruments NanoScope  
 Scan size 300.0 nm  
 Scan rate 2.001 Hz  
 Number of samples 256  
 Image Data Height  
 Data scale 1.000 nm

**G<sub>3</sub>C-ds**

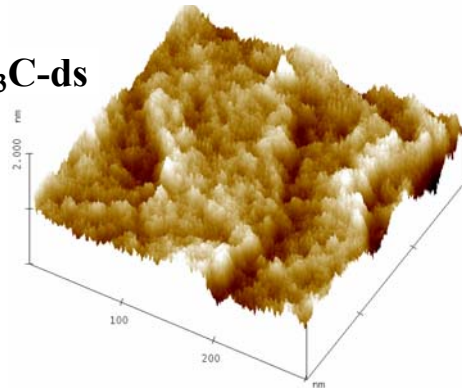

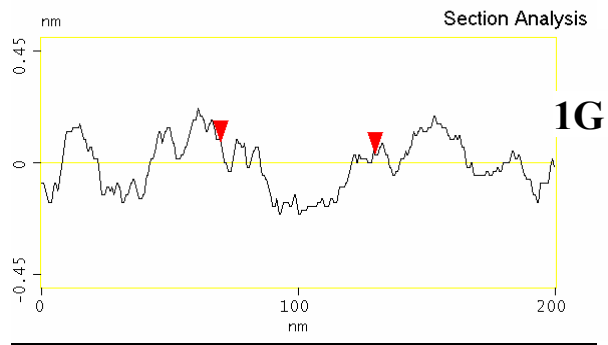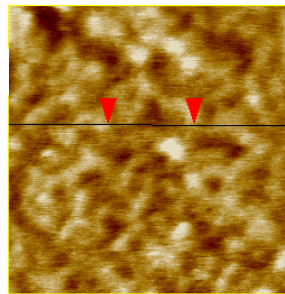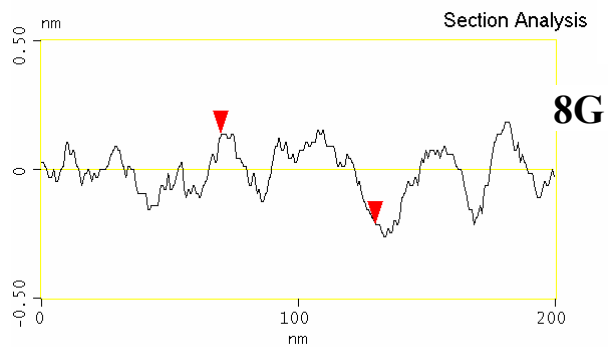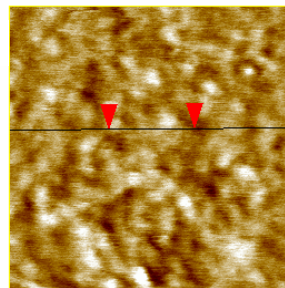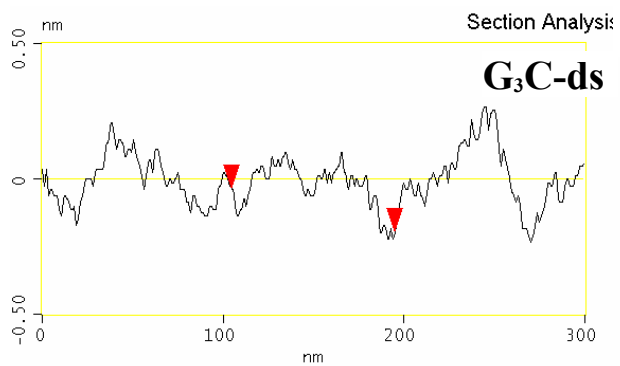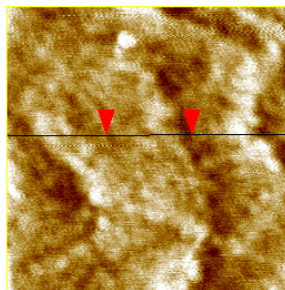

Supplement: pnas_102_1_15__4.pdf [file pnas_102_1_15__4.pdf]
