# Supplementary material
Source: PubMed Central journal article supplement (PMC544061)

Reducing agent: + - -

S-H S-S OH

15nt-S-S-  
15nt  
(dimer)

15nt-3'S-  
15nt-

15nt-3'OH

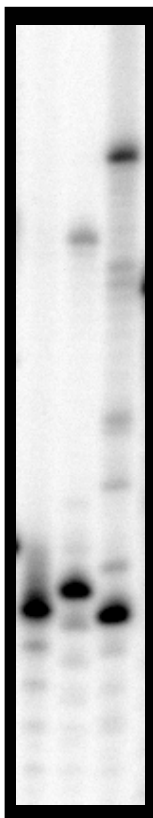

Supplement: pnas_102_1_15__2.pdf [file pnas_102_1_15__2.pdf]

Red – 1G Green – 8G

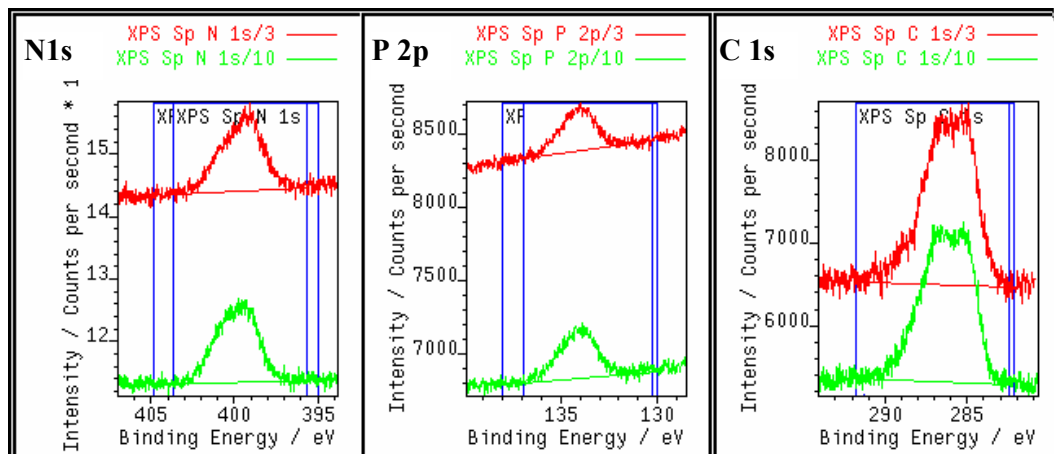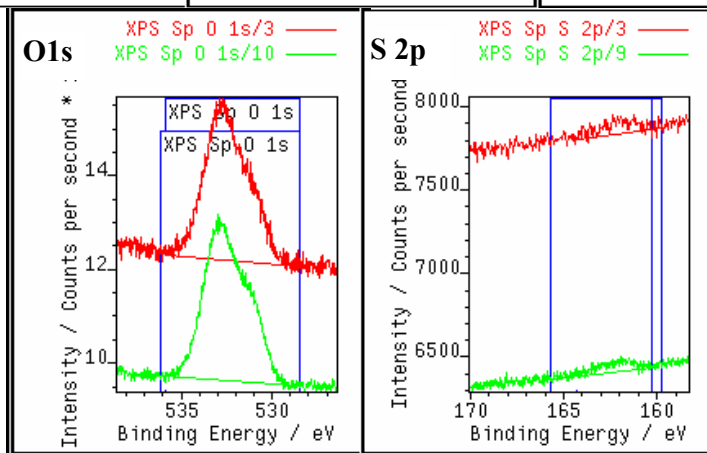

Supplement: pnas_102_1_15__5.pdf [file pnas_102_1_15__5.pdf]

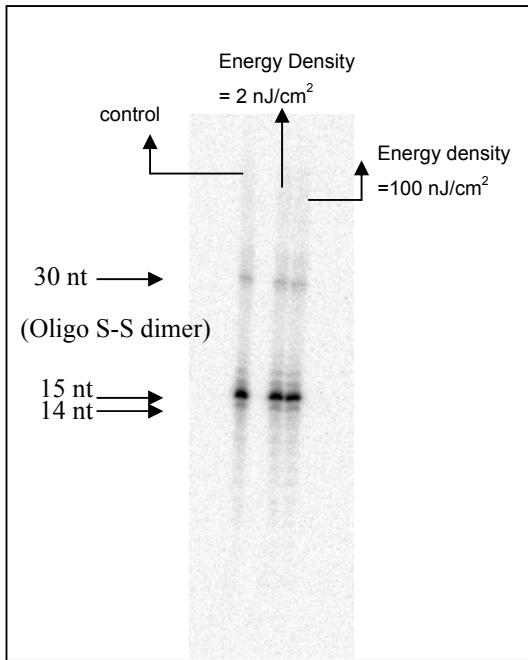

Supplement: pnas_102_1_15__6.pdf [file pnas_102_1_15__6.pdf]

# Electron transmission spectrum for ss DNA ( $1G^5$ ) at different laser pulse energy ( picojoule)

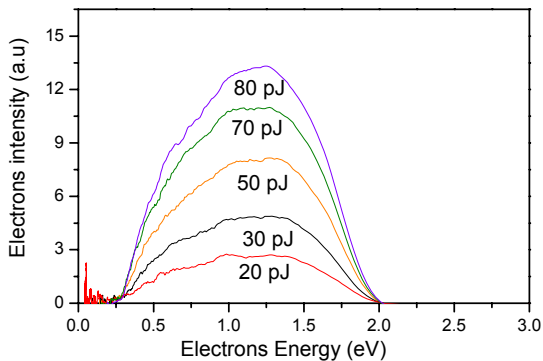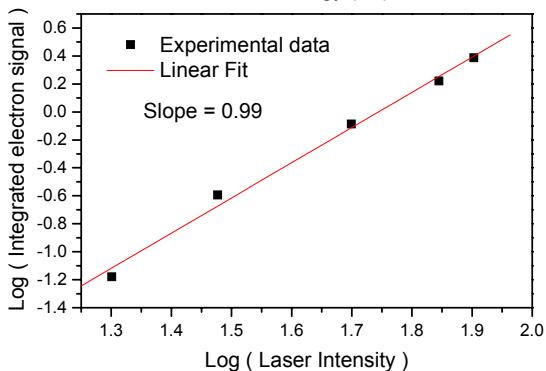

Supplement: pnas_102_1_15__7.pdf [file pnas_102_1_15__7.pdf]

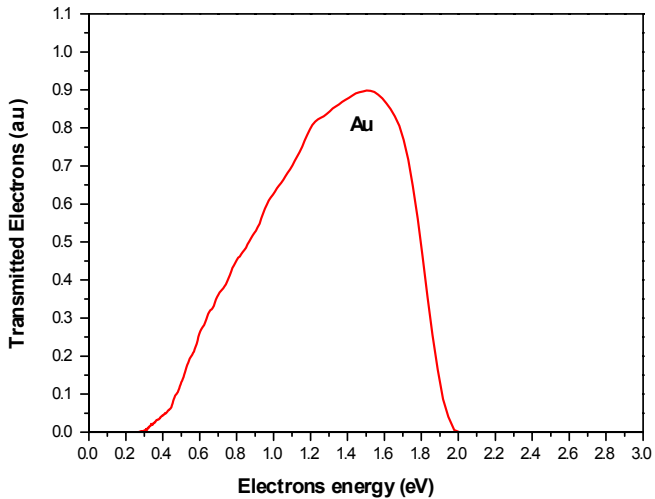

Supplement: pnas_102_1_15__8.pdf [file pnas_102_1_15__8.pdf]
